# Supplementary material
Source: bioRxiv or medRxiv preprint supplement (https://www.biorxiv.org/highwire/filestream/47047/field_highwire_adjunct_files/9/137695-9.pdf)
Supplement: Supplementary file [file 137695-9.pdf]

**Table S2:** *Myxococcus xanthus* strains used in this study. Related to STAR methods.

| Plasmids             | Relevant characteristics                                                                                                                                                                  | Source or reference   |
|----------------------|-------------------------------------------------------------------------------------------------------------------------------------------------------------------------------------------|-----------------------|
| pBJ114               | Used to create deletions, galK, KmR                                                                                                                                                       | Julien et al., 2000   |
| pSUW19               | KmR used to integrate genes ectopically at Mx8 att                                                                                                                                        | Leonardy et al., 2010 |
| pSUW30               | TcR used to integrate genes ectopically at Mx8 att                                                                                                                                        | Leonardy et al., 2010 |
| pEFrzSY              | pEYFPN1 with a cassette allowing construction of the frzS-yfp chimeric gene                                                                                                               | Laboratory collection |
| pBJ114 $\Delta$ mglA | pBJ114 with a deletion cassette for mglA                                                                                                                                                  | Mauriello et al. 2010 |
| pBJ114 $\Delta$ mglB | pBJ114 with a deletion cassette for mglB                                                                                                                                                  | Zhang et al 2010      |
| pBJ114 $\Delta$ romR | pBJ114 with a deletion cassette for romR                                                                                                                                                  | Zhang et al 2012      |
| pBJ114 $\Delta$ frzE | pBJ114 with a deletion cassette for frzE                                                                                                                                                  | Bustamante et al 2004 |
| pBJ114 $\Delta$ frzZ | pBJ114 with a deletion cassette for frzZ                                                                                                                                                  | Bustamante et al 2004 |
| pSWU30 mglAYFP       | pSWU30 allowing expression of mglA-yfp from its own promoter at Mx8att                                                                                                                    | Zhang et al 2010      |
| pSWU19 mglBYFP       | pSWU19 allowing expression of mglB-yfp from its own promoter at Mx8att                                                                                                                    | Zhang et al 2010      |
| pBJ114 romRmCh       | pBJ114 allowing expression of romR-mCh from endogenous locus                                                                                                                              | Zhang et al 2012      |
| pGEX(M)              | pGEX derivative with a 321-bp EcoRI/BamHI fragment from pET19b introducing a HindIII site in the pGEX polylinker                                                                          | Molle et al 2003      |
| pETPhos              | pET-15b (Novagen) derivative including the replacement of the thrombin site coding sequence with a tobacco etch virus (TEV) protease site and Ser to Gly mutagenesis in the Nterm His-tag | Guzzo et al 2015      |
| pETDuet              | pETDuet <sup>TM</sup> -1 DNA - Novagen ; vector encodes two multiple cloning sites, each of which is preceded by a T7 promoter, lac operator and ribosome binding sites.                  | Novagen               |
| pETPhos_frzCD        | pETPhos derivative used to express His-tagged fusion of <i>Myxococcus xanthus</i> FrzCD in <i>E. coli</i>                                                                                 | Guzzo et al 2015      |
| pETPhos_frzEkinase   | pETPhos derivative used to express His-tagged fusion of <i>Myxococcus xanthus</i> FrzE in <i>E. coli</i>                                                                                  | Guzzo et al 2015      |
| pGEX(M)_frzA         | pGEX(M) derivative used to express GST-tagged fusion of <i>Myxococcus xanthus</i> FrzA in <i>E. coli</i>                                                                                  | Guzzo et al 2015      |
| pETPhos_frzZ         | pETPhos derivative used to express His-tagged fusion of <i>Myxococcus xanthus</i> FrzZ in <i>E. coli</i>                                                                                  | This work             |
| pETPhos_frzX         | pETPhos derivative used to express His-tagged fusion of <i>Myxococcus xanthus</i> FrzX in <i>E. coli</i>                                                                                  | This work             |
| pETPhos_frzXD55A     | pETPhos derivative used to express His-tagged fusion of <i>Myxococcus xanthus</i> FrzXD55A in <i>E. coli</i>                                                                              | This work             |
| pETDuet-RomR         | pETDUET used to overexpress His-tagged fusion of <i>Myxococcus xanthus</i> RomR in <i>E.coli</i>                                                                                          | This work             |
| pETDuet-RomR-RR      | pETDUET used to overexpress His-tagged fusion of <i>Myxococcus xanthus</i> RomR-RR in <i>E.coli</i>                                                                                       | This work             |
| pBJ114 $\Delta$ frzX | pBJ114 with a deletion cassette for frzX                                                                                                                                                  | This work             |

|                          |                                                                                        |           |
|--------------------------|----------------------------------------------------------------------------------------|-----------|
| pBJ114 romRD53E          | pBJ114 with romRD53E point mutation for double homologous recombination at native site | This work |
| pBJ114 romRD53N          | pBJ114 with romRD53N mutation for double homologous recombination at native site       | This work |
| pSWU30 frzX              | pSWU30 with frzX gene under frzX promoter                                              | This work |
| pSWU19 frzXD55A          | pSWU19 with frzXD55A gene under frzX promoter                                          | This work |
| pBJ114 romR-sfGFP        | pBJ114 for clean replacement with romR-sfGFP at the locus                              | This work |
| pBJ114 frzZ-mcherry      | pBJ114 with frzZ-mCherry fusion for single step integration at native site             | This work |
| pSUW19 sfGFP-linker-frzX | pSWU19 with sfGFP-linker-frzX fusion under frzX promoter                               | This work |
| pSUW30 sfGFP-linker-frzX | pSWU30 with sfGFP-linker-frzX fusion under frzX promoter                               | This work |
